## **Indigenous knowledge of plant uses by the community of Batiaghata, Khulna, Bangladesh**

Tama Ray<sup>1\*</sup>, Md. Sharif Hasan Limon<sup>1</sup>, Md. Sajjad Hossain Tuhin<sup>1</sup> and Arifa Sharmin<sup>1</sup>

<sup>1</sup>Forestry and Wood Technology Discipline, Khulna University, Khulna-9208, Bangladesh.

\*Correspondence: [tamaray123@gmail.com](mailto:tamaray123@gmail.com)

## 1 **Abstract**

2 Southwestern region of Bangladesh is very rich in floral diversity, and their diversified uses. An  
3 extensive survey was conducted to investigate ethnobotanical applications of botanical species  
4 by the community of Khulna, Bangladesh. We focused on plants and community relationships,  
5 identify the most important species used, determine the relative importance of the species  
6 surveyed and calculated the Fidelity level (FI) and Cultural Significance Index (CSI) concerning  
7 individual species. In total, we have listed 136 species of 114 genera under 52 families, of which  
8 32% (45 species) were used for folk medicine. Inheritance of traditional knowledge of medicinal  
9 plants was the primary source of knowledge acquisition through oral transmission over the  
10 generations. However, only 34% of the informants were traditional herbal practitioners. Most of  
11 the medicinal uses are primly associated with anti-inflammatory, anti-microbial, antiseptic,  
12 expectorant, antidote, fever reduction, and pain relief.

13 **Keywords:** Plants, Ethnobotany, Homestead, Khulna, Bangladesh.

## 14 **1. Introduction**

15 Geographically, most of the territories of Bangladesh are formed by a delta plain with a tropical  
16 monsoon climate. It is vibrant with a vast biological diversity (Chowdhury and Koike, 2010) and  
17 lies under the Indo-Burma biological hotspot area (Mukul *et al.*, 2008). In total, 7,000 floral  
18 species were listed from this area with several endemic plants, and 50% of them are herb, 35%  
19 shrub, and woody climber and 15 % tree (Rahaman, 2004). Meanwhile, angiosperms are  
20 dominated in checklists with 5,700 species followed by 1,700 pteridophytes, 500 medicinal plant  
21 species, 130 fiber yielding plants species, 68 woody legume species, 29 orchid species and three  
22 species of gymnosperm (Mukul *et al.*, 2008). However, Ahamed *et al.*, (2007-2009), has enlisted  
23 3611 angiosperm, 195 pteridophyte species, and seven gymnosperm species, excluding Bacteria

24 and fungi. In addition to that, there are 750–800 more tree species found in these areas, including  
25 indigenous, exotic, and naturalized ones (Irfanullah, 2011). Among all different regions, the hilly  
26 region is the richest one in consideration of floristic diversity and richness with 2,260 plant  
27 species (Mukul *et al.*, 2008).

28 In Bangladesh, humans and plants share the natural habitats with traditional bonding and  
29 influence each other (Partha, 2014). Still, at most of the aspects of biological and economic  
30 needs, people depend on plants for food, shelter, construction materials, clothing, medicines,  
31 rituals, fuelwood, household implements, musical instruments, pesticides and so on (Gemedo-  
32 Dalle *et al.*, 2005). This dependency became the grass-root basis of species conservation for  
33 humans (Singh *et al.*, 2002). But at present, people are using trees in an exploiting manner for  
34 the economy (Idu, 2009; Kargioglu *et al.*, 2008). As a result, number of plants species is  
35 decreasing at faster rate, along with the knowledge of traditional use of those species (Balick and  
36 Cox 1996; Avocèvou-Ayisso *et al.*, 2012). Several studies have identified scarcity of  
37 ethnobotanical information and the lack of transmission of ethnobotanical knowledge from  
38 generation to generation as the crucial factors in disappearance of species from a locality (Khan  
39 *et al.*, 2018). Currently, ethnobotanical knowledge about medicinal plants found exposure to the  
40 scientific community and several studies have been conducted regarding this issue (Yusuf *et al.*,  
41 2006; Partha and Hossain 2007; Roy *et al.*, 2008; Rahmatullah *et al.*, 2012; Uddin *et al.*, 2012).  
42 But most of the research missing the other usages bear comparatively the same importance in  
43 conservation and site-specific parameters. So, we considered this in this study to identify species  
44 composition and diversity, analyze the uses of species and their mode of use, and evaluate the  
45 value or importance of species within the culture.

## 46 **2. Methodology**

## 47 **2.1 Study Area**

48 The study was conducted in Batiaghata Upazila under Khulna district. It is located between  
49  $22^{\circ}46'07''$  N to  $22^{\circ}37'50''$  N and  $89^{\circ}24'14''$  E to  $89^{\circ}31'47''$  E (Fig. 1). Batiaghata  
50 experiences a subtropical climatic condition with a mild winter from October to March, hot and  
51 humid summer in March to June and moist, warm rainy monsoon in June to October. In  
52 December-January, the temperature fell to the lowest at 12-15°C, and it reached highest in April-  
53 June at 41 -45 °C. Most of the rainfall during June to October. July is the month of maximum  
54 precipitations with 20-25 days of rain. Average wind speed is over 8 Km/h during April-August,  
55 which is the highest value for this area (BBS, 2014).

56 Fig. 1: Map showing the study area.

## 57 **2.2 Demography**

58 Like other Upazilas of Bangladesh, Batiaghata is densely populated with a total population of  
59 140,574 in which 72,717 are males and 67,857 females with 40,779 units of households. Among  
60 the total population, Muslims dominate with 79,301 along with 60,894 Hindu, 285 Buddhist, 6  
61 Christian, and 85 others. Administratively, Batiaghata Upazila has seven unions named Amirpur  
62 Union, Baliadanga Union, Batiaghata Union, Bhandarkote Union, Gangarampur Union, Jalma  
63 Union, and Surkhali Union. Almost 91% of people are engaged in agriculture, followed by  
64 service (7%) and industry (2%) (BBS 2011, 2013).

## 65 **2.3 Sampling Design**

66 A reconnaissance survey was conducted in the study area before questionnaire preparation to  
67 obtain general information about the villages and the villagers. Depending on this survey, a semi-  
68 structured questionnaire was prepared for ethnobotanical information collection. Five unions  
69 (Batiaghata Union, Baliadanga Union, Gangarampur Union, Amirpur Union, and Surkhali

70 Union) have been selected and one village from each union was chosen to survey by random  
71 selection. In total, 150 households were studied in this study, where 30 houses were chosen  
72 randomly from every village for data collection. Interviewees were divided into five age groups  
73 (20-34, 35- 49, 50- 64, 65-79, 80 and above) as age plays a distinctive role in ethnobotanical  
74 knowledge (Nawash *et al.*, 2014). Cited plant species were checked physically, photographed,  
75 and voucher specimens were collected for further identification and conservation. Collected  
76 specimens were analyzed and identified based on the key provided by Hooker (1872-1890),  
77 Prain (1903-04), Kanjilal *et al.*, (1934-1940), Deb (1983), Matthew (1999) and Ahmed et al.  
78 (2007-09).

## 79 **2.4 Calculations**

80 After collecting data, they were categorized according to their specific use such as food,  
81 medicine, construction, fuel, ornamental, and others and analyzed according to the following  
82 indices.

83 a) Fidelity level,  $FL = I_p - I_u * 100\%$  (Friedman 1986; Hoffman and Gallaher 2007)

84 Here,  $I_p$  = Number of informants who cited the species for the particular use.

85  $I_u$  = Total number of informants that mentioned the plant for any use.

86 b) Cultural significance index,  $CSI = \sum (i * e * c) * CF$  (Turner 1988; Stoffl *et al.*, 1990; Hoffman  
87 and Gallaher 2007)

88 Here,  $I$  = species management where, 1 indicates non- managed and 2 indicates managed.

89  $E$  = Use preference where 1 indicates non- preferred and 2 indicates preferred.

90  $C$  = Use frequency where 1 indicates rarely used, and 2 indicates frequently used.

91  $CF$  (Correction factor) = Number of citations for a given species divided by the number of  
92 citations for the most mentioned species.

### 93 3. Result

94 In total, 136 species of 114 genera under 52 families have been identified throughout this study.  
95 Among the counted species, 41% species were utilized as food, followed by 30% medicine, 14%  
96 constructional timber, 11% ornamental, and 4% other uses (Fig. 2a). Forty-four species have  
97 been cited by the informants to be used in the treatment of various human diseases, including  
98 respiratory, digestive, liver, skin, rheumatism, diabetes, cancer, and other disorders. Among the  
99 150 informants interviewed, 72.6% were males, and 27.4% were females, with 74.3% above 50  
100 years of age. Inheritance of traditional knowledge of medicinal plants was the primary source of  
101 knowledge acquisition through oral transmission over the generations. However, only 34% of the  
102 informants were traditional herbal practitioners, with the remaining majority (66%) of informants  
103 having no professional practice of herbal medicine.

#### 104 Fig. 2: Composition of identified species, (a) different uses (b) life forms

105 One hundred thirty-six floral species have been cited in the homestead of the study area  
106 belonging to 52 families and 114 genera. Fabaceae (17) found the most dominant family  
107 followed by Anacardiaceae (6), Myrtaceae (6), Apocynaceae (5), Arecaceae (5), Malvaceae (5),  
108 Moraceae (5), Solanaceae (5) (Fig. 3). Horticultural species like Syzygium (5), Terminalia (4)  
109 Artocarpus (2) found most dominant over other species. The life forms and growth habits of  
110 plants were distributed into 49.3% trees, 19.9% herb, 1.5% grass, 1.5% palm, and 0.7% vine  
111 (Fig. 2b). Most of the medicinal uses are undoubtedly associated with anti-inflammatory, anti-  
112 microbial and antiseptic, antibacterial, expectorant, antidote, fever reduction, and pain relief.

#### 113 Fig. 3: Dominant Families of the study area

114 *Mangifera indica* found most cited species over the study area with a high informant consensus  
115 (IC) of 86, followed by *Areca catechu* (79), *Cocos nucifera* (76), *Ocimum tenuiflorum* (73);

116 *Swietenia macrophylla* (73), *Albizia lebbek* (69) and so on. In terms of Fidelity Index (FI %),  
117 114 species scored 100%, which indicates the dedicated use of those species without any  
118 alternatives. Cultural Significance Index ranges from 13.58 to 0.08. Six species lie above ten,  
119 namely, *Ocimum tenuiflorum* (13.58), *Mangifera indica* (13), *Areca catechu* (11.94), *Cocos*  
120 *nucifera* (11.49), *Swietenia macrophylla* (11.03), *Albizia lebbek* (10.43) (Table 1).

121 Table 1. Summary of the study

#### 122 **4. Discussion**

123 A considerable amount of floral species has been used traditionally by the local community with  
124 diversified implications in the study area. Very few studies have been done in this region to  
125 preserve the ethnobotanical knowledge inherited by generations. In 2009, Nawaz et al. listed 26  
126 plant species from 22 families used in ethno-medicine from Khulna and Jessore, Mollik *et al.*,  
127 (2009) identified 33 species in folk medicine from Khulna division and Ray and Mandol (2018)  
128 describe 25 species from Shyamnagar, Satkhira near Sundarbans. However, at present studies,  
129 136 species of 114 genera under 52 families were identified, of which 45 species have been  
130 reported to be used in folk medicine.

131 The use-value indicates the total number of uses of a specific species and two types of tally have  
132 been used for calculations, Uses Total (Researcher Tally) indicated specific applications and  
133 Use- Value indicated individual allocation. However, in researcher tally, the uses were recorded,  
134 ranked, and summed, which showed a similar contingency to previous studies (Rahman, 2013;  
135 Ray and Mandol, 2018; Faruque *et al.*, 2018). In this study, food, fuel, medicine, construction,  
136 ornamental, and other categories were used to investigate multiple uses of a single species and  
137 numerous species for individual use.

138 We have found the highest species use-value for *Mangifera indica* (0.95), and total use is also  
139 very high for it (86), which means the highest number of people engage with this species by its  
140 meaningful use at their daily life. Meanwhile, *Cuscuta reflexa* remains at the lowest level (0.01)  
141 for its minimal use by the lowest number of people from the participants. In terms of fidelity  
142 level, it describes the importance of the species for any specific purpose. It is used to identify the  
143 preferable species used by key informants for one particular treatment. Species having high  
144 fidelity levels is generally widely used for dedicated purposes. It also illustrates the number of  
145 informants in the percentage who state the use of certain species for the same purpose (Khan *et*  
146 *al.*, 2014). Following that, fidelity levels were calculated highest (100%) for most of the species  
147 (114), which represents the single specific use of those species. But Lower fidelity level indicates  
148 multiple uses of a species, and we found 24 species have various applications with lower fidelity  
149 levels. *Alocasia indica* has the fidelity level 100% having one primary purpose of use as food.  
150 114 (83.33%) species have the highest (100%) fidelity level, which indicates single use of those  
151 species. *Sesbania grandiflora* found lowest FI% (33.33), indicating multiple uses (Table 01).  
152 Cultural Significant index (CSI) indicates the versatility of the application of a species along  
153 with the number of informants it uses, which means the spread of the use of the species (Prthiban  
154 *et al.*, 2016). We have calculated the highest CSI for *Ocimum tenuiflorum* (13.58), which  
155 indicates different uses like medicinal and worship purposes.  
156 The identified species composition showed higher diversity in use and practice. Religion, social  
157 strata, and economic conditions plays pivotal role to regulate the level of applications and  
158 inheritance of ethnobotanical knowledge. The current study found that most of the information  
159 (66%) about ethnobotany was inherited through oral communications. The aged personals of the  
160 community have a significant role in transmitting this knowledge among the population. In



161 addition to that, several professionals, locally named as Kabiraj or Gunim (traditional healer),  
162 also have a strong influence over folk medicine use at the community level. Local people also  
163 cited that the use and practice of folk medicine is diminishing. Limited use of this folk medicine  
164 also threatened the conservation of the species in the region. Currently, most of the medicinal  
165 purposes are limited to treat anti-inflammatory, anti-microbial and antiseptic, antibacterial,  
166 expectorant, antidote, fever reduction, and pain relief.

## 167 **5. Acknowledgment**

168 Authors are grateful to Late Md. Shirazul Islam Sheikh, Katianangla, Batiaghata, Khulna, for his  
169 active participation and supporting field data collection process.

## 170 **6. References**

- 171 Ahamed Z. U., Z. N. T Begum, M. Khondokar, S. M. H. Kabir, M. Ahmed, A. T. A. Ahmed, A. K. A.  
172 Rahaman and E.U. Haque (eds). 2007-2009. *Encyclopedia of Flora and Fauna of Bangladesh*,  
173 Vol 6-12. Asiatic Society of Bangladesh, Dhaka, Bangladesh.
- 174 Avocèvou-Ayisso, C., T H. Avohou, M. Omorou, G. Dessou, and B. Sinsin. 2012. Ethnobotany of  
175 *Pentadesma butyracea* in Benin: A quantitative approach. *Ethnobotany Research and*  
176 *Applications* 10: 151-166.
- 177 Balick, M. J. and A. Cox, 1996. *Plants that heal; people and culture: the science of ethnobotany*. Scientific  
178 American Library, Bronx, New York, USA.
- 179 BBS. 2011. *Population and housing census 2011 Dhaka, Bangladesh*. Bangladesh Bureau of  
180 Statistics, Statistics Division, Dhaka, Bangladesh.
- 181 BBS. 2013. *District Statistics 2011 Khulna*. Dhaka, Bangladesh: Bangladesh Bureau of Statistics, Statistics  
182 Division, Dhaka, Bangladesh.
- 183 BBS. 2014. *Statistical Pocketbook of Bangladesh – 2013*. Bangladesh Bureau of Statistics. Ministry of  
184 planning. People's Republic of Bangladesh, Dhaka, Bangladesh.

- 185 Chowdhury, M. S. H. and M. Koike. 2010. An overview on the protected area system for forest conservation  
186 in Bangladesh. *Journal of Forestry research* 21(1): 111-118. DOI:[10.1007/s11676-010-0019-x](https://doi.org/10.1007/s11676-010-0019-x)
- 187 Deb, D. B. 1983. *The flora of Tripura*, Vol (1-3). Today and tomorrow printers and publishers, New Delhi,  
188 India.
- 189 Faruque, M. O., S. B. Uddin, J. W. Barlow, S. Hu, S. Dong, Q. Cai, and X. Hu. 2018. Quantitative  
190 ethnobotany of medicinal plants used by indigenous communities in the Bandarban District of  
191 Bangladesh. *Frontiers in pharmacology* 9: 40. DOI:[10.3389/fphar.2018.00040](https://doi.org/10.3389/fphar.2018.00040)
- 192 Friedman, J., Z. Yaniv, A. Dafni and D. Palewitch. 1986. A preliminary classification of the healing  
193 potential of medicinal plants, based on a rational analysis of an ethnopharmacological field  
194 survey among Bedouins in the Negev Desert, Israel. *Journal of Ethnopharmacology* 16:275-  
195 287. DOI:[10.1016/0378-8741\(86\)90094-2](https://doi.org/10.1016/0378-8741(86)90094-2)
- 196 Gemedo-Dalle, T., B. L. Maass, and J. Isselstein. (2005). Plant biodiversity and ethnobotany of Borana  
197 pastoralists in southern Oromia. *Ethiopia. Economic Botany* 59(1): 43-65. DOI:[10.1663/0013-  
198 0001\(2005\)059\[0043:PBAEOB\]2.0.CO;2](https://doi.org/10.1663/0013-0001(2005)059[0043:PBAEOB]2.0.CO;2)
- 199 Hoffman, B. and T. Gallaher 2007. Importance indices in ethnobotany. *Ethnobotany Research and  
200 Applications* 5: 201-218.
- 201 Hooker, J.D. 1872-1897. *The Flora of British India*, Vols. (1-7) (Reprint. 1973). Bishen Singh Mahendra  
202 Pal Singh, Dehradun, India.
- 203 Idu, M. 2009. Ethnobotany today-who are the players? *Tropical Journal of Pharmaceutical Research* 8(4):  
204 295-296.
- 205 Irfanullah, H.M. 2011. Conserving threatened plants of Bangladesh: Miles to go before we start?  
206 *Bangladesh Journal of Plant Taxonomy* 18(1): 81-91. DOI:[10.3329/bjpt.v18i1.7844](https://doi.org/10.3329/bjpt.v18i1.7844)
- 207 Kanjilal, U.N., P.C. Kanjilal, R. N. De and A. Das. 1934-1940. *Flora of Assam*, Vol 1-4. (Reprint. 1982).  
208 A Von Book Company, Delhi, India.

- 209 Kargioğlu, M., S. Cenkci, A. Serteser, N. Evliyaoğlu, M. Konuk, M.S. Kök, and Y. Bağcı. 2008. An  
210 ethnobotanical survey of inner-West Anatolia, Turkey. *Human Ecology* 36(5): 763-777.  
211 DOI:[10.1007/s10745-008-9198-x](https://doi.org/10.1007/s10745-008-9198-x)
- 212 Mollik, M. A. H., M. R. Faruque, M. Badruddaza, A. Chowdhury and M. S. Rahman. 2009. Medicinal  
213 plants from Sundarbans used for the prevention of cardiovascular diseases: a pragmatic  
214 randomized ethnobotanical survey in Khulna division of Bangladesh. *European Journal of*  
215 *Integrative Medicine* 1(4): 231-232. DOI:[10.1016/j.eujim.2009.08.018](https://doi.org/10.1016/j.eujim.2009.08.018)
- 216 Matthew, K. M. 1999. *The flora of the Palni Hills, South India*, Vol (1-4). The Rapinat Herbarium,  
217 Tiruchirapalli, India.
- 218 Mukul, S. A., M. B. Uddin, M. S. Uddin, M. A. S. A. Khan, and B. Marzan. 2008. Protected areas of  
219 Bangladesh: current status and efficacy for biodiversity conservation. *Proceedings of the*  
220 *Pakistan Academy of Sciences* 45(2): 59-68.
- 221 Nawash, O., A. Al-Assaf, A. El-oqlah, and M. Omari. (2014). Floristic features, distribution, and  
222 ethnobotany of plants gathered and used by local people from the Mediterranean forest in  
223 Northern Jordan. *Ethnobotany Research and Applications* 12: 385-396.
- 224 Nawaz, A. H. M. M., M. Hossain, M. Karim, M. Khan, R. Jahan and M. Rahmatullah. 2009. An  
225 ethnobotanical survey of Jessore district in Khulna division, Bangladesh. *American-Eurasian*  
226 *Journal of Sustainable Agriculture* 3(2): 238-243.
- 227 Partha, P. 2014. Ethnobotany of the Laleng (Partha) Community in Bangladesh. *Journal of Pharmacognosy*  
228 *and Phytochemistry* 2(6): 173-184.
- 229 Partha, P. and A. E. Hossain. 2007. Ethnobotanical investigation into the Mandi ethnic community in  
230 Bangladesh. *Bangladesh Journal of Plant Taxonomy* 14(2): 129-145.  
231 DOI:[10.3329/bjpt.v14i2.532](https://doi.org/10.3329/bjpt.v14i2.532)
- 232 Parthiban, R., S. Vijayakumar, S. Prabhu, and J. M. E. M. Yabesh. 2016. Quantitative traditional knowledge  
233 of medicinal plants used to treat livestock diseases from Kudavasal taluk of Thiruvarur district,

- 234 Tamil Nadu, India. *Revista Brasileira de Farmacognosia* 26(1): 109-121.  
235 DOI:[10.1016/j.bjp.2015.07.016](https://doi.org/10.1016/j.bjp.2015.07.016)
- 236 Prain, D. 1903-04. *Bengal Plants*. Vols. (1- 2). Indian Reprint Edition 1963, Calcutta, India.
- 237 Rahman, M.M. 2004. *Forest resources of Bangladesh with reference to conservation of biodiversity and*  
238 *wildlife in particular for poverty alleviation*. In Proceedings of the workshop on Forests for  
239 poverty reduction: Opportunities with clean development mechanism, environmental services  
240 and biodiversity. Bangkok: FAO Regional Office for Asia and the Pacific (FAO-RAP). Pp. 139-  
241 148.
- 242 Rahman, A. H. M. M. 2013. Medico-Ethnobotany: A study on the tribal people of Rajshahi Division,  
243 Bangladesh. *Peak Journal of Medicinal Plants Research* 1(1): 1-8.
- 244 Rahmatullah, M., M. N. K. Azam, I. Malek, D. Nasrin, F. Jamal, M. A. Rahman, Z. Khatun, S. Jahan, S.  
245 Seraj and R. Jahan. 2012. An ethnomedicinal survey among the Marakh sect of the Garo tribe  
246 of Mymensingh district, Bangladesh. *International Journal of PharmTech Research* 4: 141–  
247 149.
- 248 Khan, M., Z. K. Shinwari, M. Shah and S. Musharaf. 2014. An ethnobotanical survey of medicinal and  
249 other useful plants of Khattak Tribe in Tehsil Karak, Khyber Pakhtunkhwa, *Pakistan*.  
250 *Medicinal Plant Research* 4(8): 61-66.
- 251 Khan, M. N., A. Razzaq, F. Hadi, N. Khan, A. Basit, F. Jan and N. Khan. 2018. Ethnobotanical profile of  
252 weed flora of district Charsadda, Khyber Pakhtunkhwa. *RADS Journal of Biological Research*  
253 *& Applied Sciences* 9(1): 14-23.
- 254 Roy, S., M.Z. Uddin, M. A. Hassan and M. M. Rahman. 2008. Medico-botanical report on the Chakma  
255 community of Bangladesh. *Bangladesh Journal of Plant Taxonomy* 15(1): 67-72.
- 256 Singh, A. K., A. S. Raghubanshi, and J. S. Singh. 2002. Medical ethnobotany of the tribals of Sonaghati of  
257 Sonbhadra district, Uttar Pradesh, India. *Journal of ethnopharmacology* 81(1): 31-41.  
258 DOI:[10.1016/S0378-8741\(02\)00028-4](https://doi.org/10.1016/S0378-8741(02)00028-4)

- 259 Stoffl, R.W., D.B. Halm, M.J. Evans and J.E. Olmsted. 1990. Calculating the cultural significance of  
260 American Indian plants: Paiute and Shoshone ethnobotany at Yucca Mountain, Nevada.  
261 *American Anthropologist* 92:416-432. DOI:[10.1525/aa.1990.92.2.02a00100](https://doi.org/10.1525/aa.1990.92.2.02a00100)
- 262 Ray, T. and K. Mondal. 2018. Ethnobotanical Study of Munshiganj in Shyamnagar Upazilla, Satkhira,  
263 Bangladesh. *American-Eurasian Journal of Sustainable Agriculture* 12(1): 22-31.  
264 DOI:[10.22587/aejsa.2018.12.1.4](https://doi.org/10.22587/aejsa.2018.12.1.4)
- 265 Turner, N.J. 1988. "The importance of a rose": Evaluating the cultural significance of plants in Thompson  
266 and Lillooet Interior Salish. *American Anthropologist* 90:272-290.
- 267 Uddin, M.Z., M. A. Hassan, M. Rahman and K. Arefin. 2012. Ethno-medico-botanical study in Lawachara  
268 National park, Bangladesh. *Bangladesh Journal of Botany* 41(1): 97-104.  
269 DOI:[10.3329/bjb.v41i1.11087](https://doi.org/10.3329/bjb.v41i1.11087)
- 270 Yusuf, M., J. Begum, M. N. Hoque, and J. U. Chowdhury. 2009. *Medicinal Plants of Bangladesh*. BCSIR,  
271 Chittagong, Bangladesh.

272 **Figures and Tables options**

273 **Figure 1:** Map showing the study area.

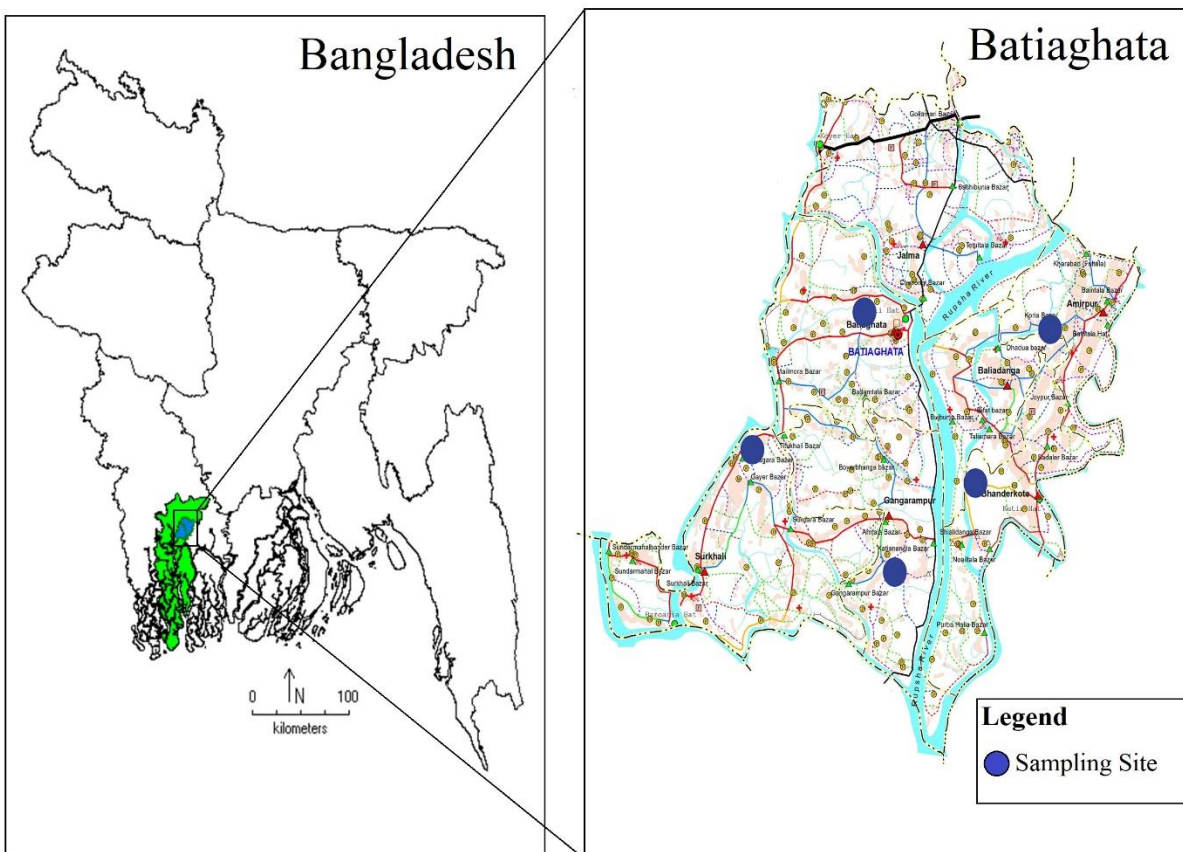

274

275 **Table 1:** Ethnobotanical indices of Batiaghata, Khulna (IC=Informant Citation; UT=Used Total;

276 FI=Fidelity Level; CSI=Cultural Significance Index; F=Food; M=Medicine; F=Fuel;

277 C=Construction; Or=Ornamental and O=Other).

| SL# | Species                                         | Family        | Habit | Use | UT | FI%   | CSI   |
|-----|-------------------------------------------------|---------------|-------|-----|----|-------|-------|
| 1.  | <i>Abroma augusta</i> (L.) L.fil.               | Malvaceae     | Tree  | M   | 1  | 100   | 0.1   |
| 2.  | <i>Acalypha hispida</i> Burm.f.                 | Euphorbiaceae | Herb  | M   | 1  | 100   | 0.08  |
| 3.  | <i>Acalypha wilkesiana</i> Müll.Arg.            | Euphorbiaceae | Shrub | O   | 14 | 100   | 1.47  |
| 4.  | <i>Aegle marmelos</i> (L.) Correa               | Rutaceae      | Tree  | F   | 35 | 100   | 3.66  |
| 5.  | <i>Albizia lebbek</i> (L.) Benth.               | Fabaceae      | Tree  | C   | 69 | 100   | 10.43 |
| 6.  | <i>Albizia richardiana</i> (Voigt) King & Prain | Fabaceae      | Tree  | C   | 55 | 100   | 7.67  |
| 7.  | <i>Allium cepa</i> L.                           | Liliaceae     | Herb  | F   | 3  | 66.67 | 0.31  |
| 8.  | <i>Alocasia macrorrhizos</i> (L.) G.Don.        | Araceae       | Herb  | F   | 4  | 100   | 0.46  |
| 9.  | <i>Aloe vera</i> (L.) Burm.f.                   | Liliaceae     | Herb  | M   | 1  | 100   | 0.1   |

|     |                                                                               |                  |       |      |    |       |       |
|-----|-------------------------------------------------------------------------------|------------------|-------|------|----|-------|-------|
| 10. | <i>Alstonia scholaris</i> (L.) R. Br.                                         | Apocynaceae      | Tree  | C    | 7  | 100   | 0.73  |
| 11. | <i>Alteranthera philoxeroides</i> (Mart.) Griseb.                             | Anacardiaceae    | Herb  | F    | 4  | 100   | 1.54  |
| 12. | <i>Amaranthus tricolor</i> L.                                                 | Anacardiaceae    | Herb  | F    | 45 | 100   | 4.7   |
| 13. | <i>Amaranthus viridis</i> L.                                                  | Anacardiaceae    | Herb  | F    | 48 | 100   | 3.9   |
| 14. | <i>Amorphophallus bulbifer</i> (Roxb.) Blume                                  | Araceae          | Herb  | F    | 13 | 92.31 | 1.26  |
| 15. | <i>Andrographis paniculata</i> (Burm.f.) Nees                                 | Acanthaceae      | Herb  | M    | 1  | 100   | 0.31  |
| 16. | <i>Anisoptera scaphula</i> (Roxb.) Kurz                                       | Dipterocarpaceae | Tree  | M    | 1  | 100   | 0.1   |
| 17. | <i>Annona squamosa</i> L                                                      | Annonaceae       | Tree  | F    | 13 | 100   | 1.36  |
| 18. | <i>Aphanamixis polystachya</i> (Wall.) R.Parker                               | Meliaceae        | Tree  | M    | 1  | 100   | 0.16  |
| 19. | <i>Areca catechu</i> L.                                                       | Arecaceae        | Plam  | F    | 79 | 100   | 11.94 |
| 20. | <i>Artocarpus heterophyllus</i> Lam.                                          | Moraceae         | Tree  | F    | 51 | 100   | 7.71  |
| 21. | <i>Artocarpus lacucha</i> Buch-Ham.                                           | Moraceae         | Tree  | C    | 39 | 94,87 | 4.3   |
| 22. | <i>Arundina graminifolia</i> (D.Don) Hochr.                                   | Orchidaceae      | Herb  | Or   | 7  | 100   | 0.57  |
| 23. | <i>Asparagus racemosus</i> Willd.                                             | Asparagaceae     | Shrub | M    | 1  | 100   | 0.1   |
| 24. | <i>Averrhoa carambola</i> L.                                                  | Oxalidaceae      | Tree  | F    | 41 | 100   | 4.29  |
| 25. | <i>Azadirachta indica</i> A.Juss.                                             | Meliaceae        | Tree  | M    | 59 | 100   | 6.17  |
| 26. | <i>Bacopa monnieri</i> (L.) Wettst.                                           | Plantaginaceae   | Herb  | F, M | 5  | 100   | 0.52  |
| 27. | <i>Bambusa tuldoidea</i> Munro                                                | Poaceae          | Grass | C    | 18 | 100   | 1.67  |
| 28. | <i>Basella alba</i> L.                                                        | Basellaceae      | Herb  | F    | 36 | 100   | 3.77  |
| 29. | <i>Berberis asiatica</i> Roxb. ex DC.                                         | Berberidaceae    | Shrub | M    | 1  | 100   | 0.08  |
| 30. | <i>Boerhavia diffusa</i> L.                                                   | Nyctaginaceae    | Herb  | M    | 1  | 100   | 0.1   |
| 31. | <i>Bombax ceiba</i> L.                                                        | Malvaceae        | Tree  | C, O | 60 | 100   | 3.45  |
| 32. | <i>Borassus flabellifer</i> L.                                                | Arecaceae        | Plam  | F    | 52 | 100   | 7.86  |
| 33. | <i>Bryophyllum pinnatum</i> (Lam.) Oken                                       | Crassulaceae     | Herb  | M    | 2  | 100   | 0.16  |
| 34. | <i>Butea monosperma</i> (Lam.) Taub.                                          | Fabaceae         | Tree  | C    | 16 | 94.11 | 1.67  |
| 35. | <i>Caesalpinia pulcherrima</i> (L.) Sw.                                       | Fabaceae         | Shrub | M    | 1  | 100   | 1.78  |
| 36. | <i>Calotropis gigantea</i> (L.) Dryand.                                       | Apocynaceae      | Shrub | M    | 1  | 100   | 0.1   |
| 37. | <i>Capsicum annuum</i> var. <i>glabriusculum</i> (Dunal) Heiser & Pickersgill | Solanaceae       | Herb  | F    | 57 | 100   | 5.97  |
| 38. | <i>Carica papaya</i> L.                                                       | Caricaceae       | Tree  | F    | 53 | 100   | 8.01  |
| 39. | <i>Carissa carandas</i> L.                                                    | Apocynaceae      | Shrub | F    | 11 | 100   | 1.15  |
| 40. | <i>Caryota urens</i> L.                                                       | Arecaceae        | Plam  | M    | 1  | 100   | 0.1   |
| 41. | <i>Cassia fistula</i> L.                                                      | Fabaceae         | Tree  | C    | 56 | 62.5  | 5.44  |
| 42. | <i>Catharanthus roseus</i> (L.) G.Don                                         | Apocynaceae      | Shrub | M    | 1  | 100   | 0.21  |
| 43. | <i>Celosia cristata</i> L.                                                    | Anacardiaceae    | Herb  | O    | 7  | 100   | 0.73  |
| 44. | <i>Centella asiatica</i> (L.) Urb.                                            | Apiaceae         | Herb  | M    | 34 | 100   | 2.78  |
| 45. | <i>Cestrum nocturnum</i> L.                                                   | Solanaceae       | Shrub | O    | 2  | 100   | 0.21  |

|     |                                                   |                |       |      |    |       |       |
|-----|---------------------------------------------------|----------------|-------|------|----|-------|-------|
| 46. | <i>Chromolaena odorata</i> (L.) R.M.King & H.Rob. | Asteraceae     | Herb  | M    | 18 | 100   | 1.88  |
| 47. | <i>Cinnamomum verum</i> J.Presl                   | Lauraceae      | Tree  | FM   | 2  | 100   | 0.21  |
| 48. | <i>Citrus aurantiifolia</i> (Christm.) Swingle    | Rutaceae       | Shrub | F    | 83 | 68.37 | 8.62  |
| 49. | <i>Citrus grandis</i> (L.) Osbeck                 | Rutaceae       | Tree  | F    | 39 | 100   | 4.08  |
| 50. | <i>Clerodendrum chinense</i> (Osbeck) Mabb.       | Lamiaceae      | Shrub | O    | 4  | 100   | 0.42  |
| 51. | <i>Clitoria ternatea</i> L.                       | Fabaceae       | Herb  | O    | 3  | 60    | 0.52  |
| 52. | <i>Cocos nucifera</i> L.                          | Arecaceae      | Plam  | F    | 76 | 100   | 11.49 |
| 53. | <i>Cucurbita maxima</i> Duchesne                  | Cucurbitaceae  | Herb  | F    | 17 | 100   | 1.78  |
| 54. | <i>Cucurbita moschata</i> Duchesne                | Cucurbitaceae  | Herb  | F    | 9  | 100   | 0.94  |
| 55. | <i>Curcuma domestica</i> Valetton                 | Zingiberaceae  | Herb  | F, M | 8  | 100   | 0.52  |
| 56. | <i>Cuscuta reflexa</i> Roxb.                      | Convolvulaceae | Herb  | M    | 1  | 100   | 1.15  |
| 57. | <i>Cynodon dactylon</i> (L.) Pers.                | Poaceae        | Grass | M    | 98 | 56.12 | 5.76  |
| 58. | <i>Dalbergia sissooides</i> Wight & Arn.          | Fabaceae       | Tree  | C    | 58 | 100   | 6.07  |
| 59. | <i>Datura metel</i> L.                            | Solanaceae     | Shrub | M    | 1  | 100   | 0.15  |
| 60. | <i>Delonix regia</i> (Hook.) Raf.                 | Fabaceae       | Tree  | C    | 17 | 100   | 1.78  |
| 61. | <i>Diospyros malabarica</i> (Desr.) Kostel.       | Ebenaceae      | Tree  | O    | 97 | 50.52 | 6.84  |
| 62. | <i>Diospyros montana</i> Roxb.                    | Ebenaceae      | Tree  | C    | 1  | 100   | 0.24  |
| 63. | <i>Elaeocarpus tectorius</i> (Lour.) Poir.        | Elaeocarpaceae | Tree  | F    | 36 | 100   | 3.77  |
| 64. | <i>Elettaria cardamomum</i> (L.) Maton            | Zingiberaceae  | Herb  | F    | 2  | 50    | 0.1   |
| 65. | <i>Erythrina ovalifolia</i> Roxb.                 | Fabaceae       | Tree  | C    | 29 | 100   | 2.36  |
| 66. | <i>Excoecaria agallocha</i> L.                    | Euphorbiaceae  | Tree  | C    | 20 | 85    | 2.37  |
| 67. | <i>Feronia limonia</i> (L.) Swingle               | Rutaceae       | Tree  | F    | 8  | 100   | 0.84  |
| 68. | <i>Ficus auriculata</i> Lour.                     | Moraceae       | Tree  | F    | 53 | 100   | 5.55  |
| 69. | <i>Ficus benghalensis</i> L.                      | Moraceae       | Tree  | C    | 12 | 100   | 1.26  |
| 70. | <i>Ficus religiosa</i> L.                         | Moraceae       | Tree  | M    | 4  | 100   | 0.41  |
| 71. | <i>Gardenia jasminoides</i> J.Ellis               | Rubiaceae      | Shrub | O    | 5  | 100   | 0.52  |
| 72. | <i>Glebionis coronaria</i> (L.) Cass. ex Spach    | Asteraceae     | Herb  | M    | 1  | 100   | 0.57  |
| 73. | <i>Gossypium arboreum</i> L.                      | Malvaceae      | Shrub | O    | 49 | 100   | 6.84  |
| 74. | <i>Helianthus annuus</i> L.                       | Asteraceae     | Herb  | F, O | 3  | 100   | 0.21  |
| 75. | <i>Heritiera fomes</i> Buch.-Ham.                 | Sterculiaceae  | Tree  | C    | 3  | 100   | 0.31  |
| 76. | <i>Hibiscus esculentus</i> L.                     | Malvaceae      | Shrub | F    | 4  | 100   | 0.56  |
| 77. | <i>Hibiscus rosa-sinensis</i> L.                  | Malvaceae      | Shrub | O    | 55 | 94.54 | 5.76  |
| 78. | <i>Ipomoea aquatica</i> Forssk.                   | Convolvulaceae | Herb  | F    | 8  | 87.5  | 0.73  |
| 79. | <i>Juglans regia</i> L.                           | Juglandaceae   | Tree  | M    | 1  | 100   | 0.1   |
| 80. | <i>Justicia adhatoda</i> L.                       | Acanthaceae    | Shrub | M    | 1  | 100   | 0.2   |
| 81. | <i>Lablab purpureus</i> (L.) Sweet                | Fabaceae       | Herb  | F    | 49 | 100   | 5.13  |
| 82. | <i>Lawsonia inermis</i> L.                        | Lythraceae     | Shrub | Or   | 24 | 100   | 3.35  |
| 83. | <i>Leucaena leucocephala</i> (Lam.) de Wit        | Fabaceae       | Tree  | C    | 16 | 100   | 1.49  |
| 84. | <i>Litchi chinensis</i> Sonn.                     | Sapindaceae    | Tree  | F    | 45 | 100   | 6.8   |



|      |                                                       |                |       |      |     |       |       |
|------|-------------------------------------------------------|----------------|-------|------|-----|-------|-------|
| 85.  | <i>Mangifera indica</i> L.                            | Anacardiaceae  | Tree  | F    | 86  | 100   | 13    |
| 86.  | <i>Manilkara zapota</i> (L.) P.Royen                  | Sapotaceae     | Tree  | F    | 63  | 100   | 9.52  |
| 87.  | <i>Mentha spicata</i> L.                              | Lamiaceae      | Herb  | F    | 2   | 50    | 0.16  |
| 88.  | <i>Mesua ferrea</i> L.                                | Calophyllaceae | Tree  | M    | 1   | 100   | 0.31  |
| 89.  | <i>Mimosa pudica</i> L.                               | Fabaceae       | Herb  | M    | 1   | 100   | 2.41  |
| 90.  | <i>Mimusops elengi</i> L.                             | Sapotaceae     | Tree  | O    | 9   | 100   | 0.94  |
| 91.  | <i>Momordica charantia</i> L.                         | Cucurbitaceae  | Herb  | F    | 21  | 100   | 1.71  |
| 92.  | <i>Moringa oleifera</i> Lam.                          | Moringaceae    | Tree  | F    | 64  | 100   | 9.67  |
| 93.  | <i>Musa paradisiaca</i> cv. Awak                      | Musaceae       | Tree  | F    | 17  | 100   | 1.78  |
| 94.  | <i>Neolamarckia cadamba</i> (Roxb.)<br>Bossier        | Rubiaceae      | Tree  | C    | 3   | 66.67 | 0.3   |
| 95.  | <i>Ocimum tenuiflorum</i> L.                          | Lamiaceae      | Shrub | M, O | 120 | 100   | 13.58 |
| 96.  | <i>Opuntia cylindrica</i> (Lam.) DC.                  | Cactaceae      | Herb  | O, M | 29  | 100   | 2.36  |
| 97.  | <i>Oxalis corniculata</i> L.                          | Oxalidaceae    | Herb  | F    | 46  | 95.65 | 4.6   |
| 98.  | <i>Phoenix sylvestris</i> (L.) Roxb.                  | Arecaceae      | Plam  | F    | 43  | 100   | 6.5   |
| 99.  | <i>Phragmites australis</i> (Cav.) Trin. ex<br>Steud. | Poaceae        | Grass | M    | 4   | 100   | 0.42  |
| 100. | <i>Phyllanthus emblica</i> L.                         | Phyllanthaceae | Tree  | F, M | 90  | 54.44 | 9.12  |
| 101. | <i>Piper betle</i> L.                                 | Piperaceae     | Herb  | F, M | 3   | 100   | 0.16  |
| 102. | <i>Piper longum</i> L.                                | Piperaceae     | Herb  | M    | 1   | 100   | 0.16  |
| 103. | <i>Piper nigrum</i> L.                                | Piperaceae     | Shrub | F, M | 6   | 100   | 0.24  |
| 104. | <i>Piper retrofractum</i> Vahl                        | Piperaceae     | Shrub | F    | 56  | 100   | 5.86  |
| 105. | <i>Pithecellobium dulce</i> (Roxb.) Benth.            | Fabaceae       | Tree  | F, U | 68  | 61.76 | 4.39  |
| 106. | <i>Polyalthia longifolia</i> (Sonn.)<br>Thwaites      | Annonaceae     | Tree  | O    | 6   | 100   | 0.56  |
| 107. | <i>Prunus bokhariensis</i> Royle ex<br>C.K.Schneid.   | Rosaceae       | Shrub | M    | 1   | 100   | 0.24  |
| 108. | <i>Psidium guajava</i> L.                             | Myrtaceae      | Tree  | F    | 66  | 100   | 9.98  |
| 109. | <i>Punica granatum</i> L.                             | Lythraceae     | Shrub | F    | 31  | 100   | 3.24  |
| 110. | <i>Rauvolfia serpentina</i> (L.) Benth. ex<br>Kurz    | Apocynaceae    | Shrub | M    | 1   | 100   | 0.16  |
| 111. | <i>Rosa × damascena</i> Herrm.                        | Rosaceae       | Shrub | Or   | 13  | 100   | 1.36  |
| 112. | <i>Santalum album</i> L.                              | Santalaceae    | Tree  | M    | 2   | 100   | 0.84  |
| 113. | <i>Senna siamea</i> (Lam.) H.S.Irwin &<br>Barneby     | Fabaceae       | Tree  | C    | 9   | 75    | 1.15  |
| 114. | <i>Sesbania grandiflora</i> (L.) Pers.                | Fabaceae       | Tree  | O    | 1   | 33.33 | 0.31  |
| 115. | <i>Smilax zeylanica</i> L.                            | Smilacaceae    | Vine  | M    | 1   | 100   | 0.31  |
| 116. | <i>Solanum melongena</i> L.                           | Solanaceae     | Shrub | F    | 47  | 100   | 4.92  |
| 117. | <i>Solanum tuberosum</i> L.                           | Solanaceae     | Shrub | F    | 26  | 100   | 2.72  |
| 118. | <i>Sonneratia apetala</i> Buch.-Ham.                  | Lythraceae     | Tree  | F    | 7   | 100   | 0.73  |
| 119. | <i>Spondias dulcis</i> Parkinson                      | Anacardiaceae  | Tree  | F    | 37  | 100   | 3.87  |
| 120. | <i>Swietenia macrophylla</i> King                     | Meliaceae      | Tree  | C    | 73  | 100   | 11.03 |
| 121. | <i>Syzygium aromaticum</i> (L.) Merr. &<br>L.M.Perry  | Myrtaceae      | Tree  | F, M | 3   | 100   | 0.28  |

|      |                                                        |               |       |      |     |      |      |
|------|--------------------------------------------------------|---------------|-------|------|-----|------|------|
| 122. | <i>Syzygium cumini</i> (L.) Skeels                     | Myrtaceae     | Tree  | F    | 63  | 100  | 9.52 |
| 123. | <i>Syzygium fruticosum</i> DC.                         | Myrtaceae     | Tree  | M    | 1   | 100  | 0.57 |
| 124. | <i>Syzygium jambos</i> (L.) Alston                     | Myrtaceae     | Tree  | F    | 1   | 100  | 0.1  |
| 125. | <i>Syzygium samarangense</i> (Blume) Merr. & L.M.Perry | Myrtaceae     | Tree  | F    | 51  | 100  | 5.34 |
| 126. | <i>Tamarindus indica</i> L.                            | Fabaceae      | Tree  | F, C | 102 | 54   | 8.95 |
| 127. | <i>Terminalia arjuna</i> (Roxb. ex DC.) Wight & Arn.   | Combretaceae  | Tree  | M    | 25  | 100  | 3.78 |
| 128. | <i>Terminalia bellirica</i> (Gaertn.) Roxb.            | Combretaceae  | Tree  | F, M | 62  | 100  | 4.74 |
| 129. | <i>Terminalia catappa</i> L.                           | Combretaceae  | Tree  | F    | 43  | 100  | 4.5  |
| 130. | <i>Terminalia chebula</i> Retz.                        | Combretaceae  | Tree  | M    | 33  | 100  | 3.45 |
| 131. | <i>Trichosanthes dioica</i> Roxb.                      | Cucurbitaceae | Tree  | F    | 3   | 100  | 0.31 |
| 132. | <i>Vigna unguiculata</i> (L.) Walp.                    | Fabaceae      | Herb  | F    | 16  | 100  | 1.67 |
| 133. | <i>Vitex negundo</i> L.                                | Lamiaceae     | Shrub | M    | 1   | 100  | 0.08 |
| 134. | <i>Xylocarpus mekongensis</i> Pierre                   | Meliaceae     | Tree  | C    | 12  | 100  | 1.26 |
| 135. | <i>Zingiber officinale</i> Roscoe                      | Zingiberaceae | Herb  | F    | 8   | 87.5 | 0.73 |
| 136. | <i>Ziziphus jujuba</i> Mill.                           | Rhamnaceae    | Tree  | F    | 47  | 100  | 7.1  |

278

279

280 Fig. 2: Composition of identified species, (a) different uses, (b) life forms.

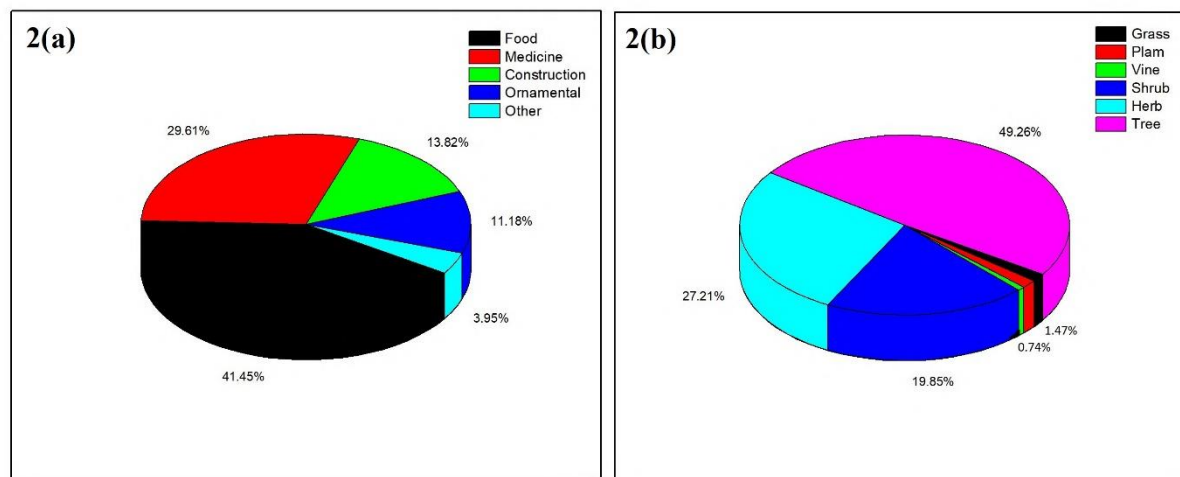

281

282 Fig. 3: Dominant Families of the study area.

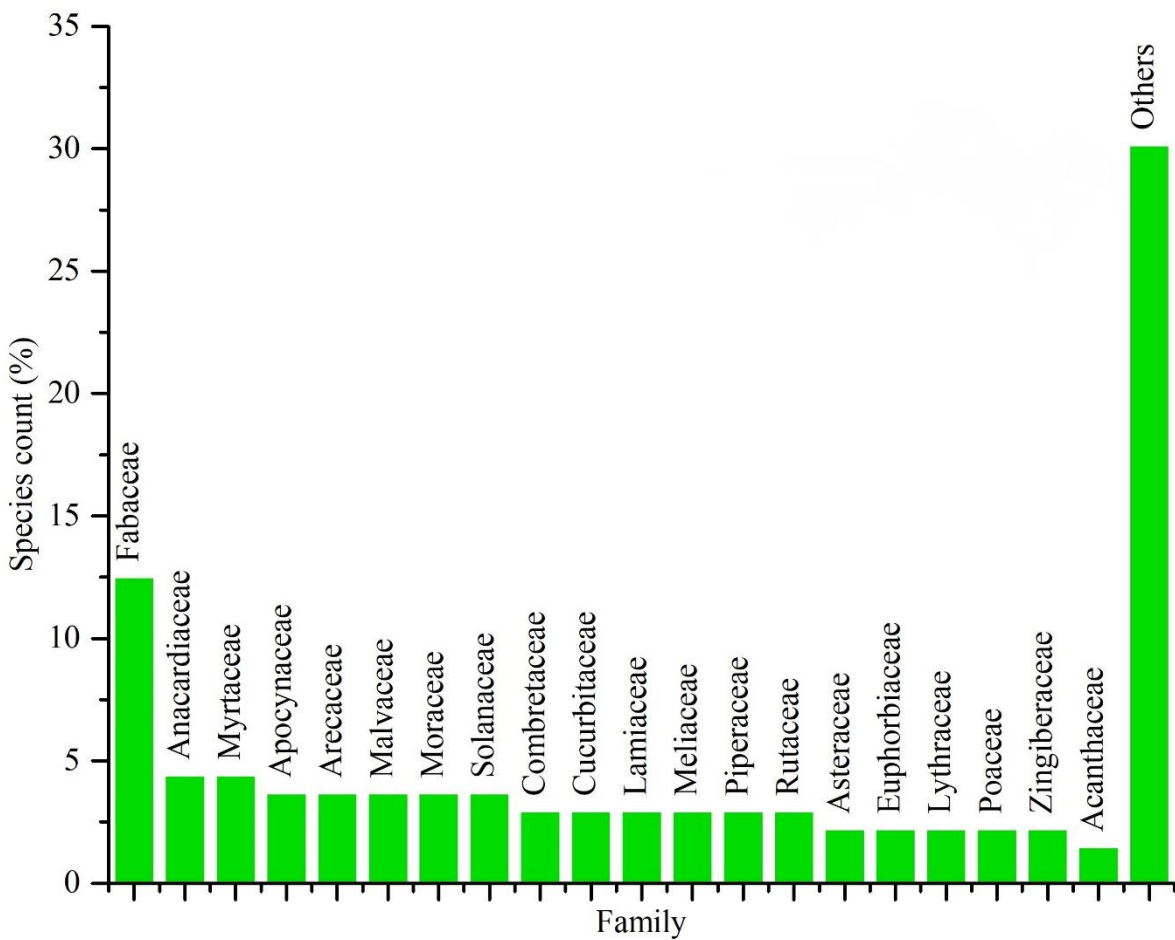

Source: https://www.biorxiv.org/content/10.1101/2020.07.22.216689v1.full.pdf
